# Supplementary material for: Treatment Outcomes of Mycobacterium avium Complex Lung Disease: A Systematic Review and Meta-analysis
Source: Oxford University Press journal article supplement (doi:10.1093/cid/cix517), 2017-06-01
Supplement: cix517_suppl_MAC_Metaanalysis_R1_supplementary_data_legends.docx [file cix517_suppl_MAC_Metaanalysis_R1_supplementary_data_legends.docx]

**Supplementary figure legends**

Supplementary Fig 1. Funnel plot for evaluation of publication bias of selected studies

Supplementary Fig 2. Weighted proportion of default from treatment for selected studies
